# Supplementary material for: Transcriptome Analysis Reveals the Vital Role of ABA Plays in Drought Tolerance of the ABA-Insensitive Alfalfa (Medicago sativa L.)
Source: MDPI journal article supplement (doi:10.3390/agronomy14030406), 2024-02-20
Supplement: s1 [file s1]

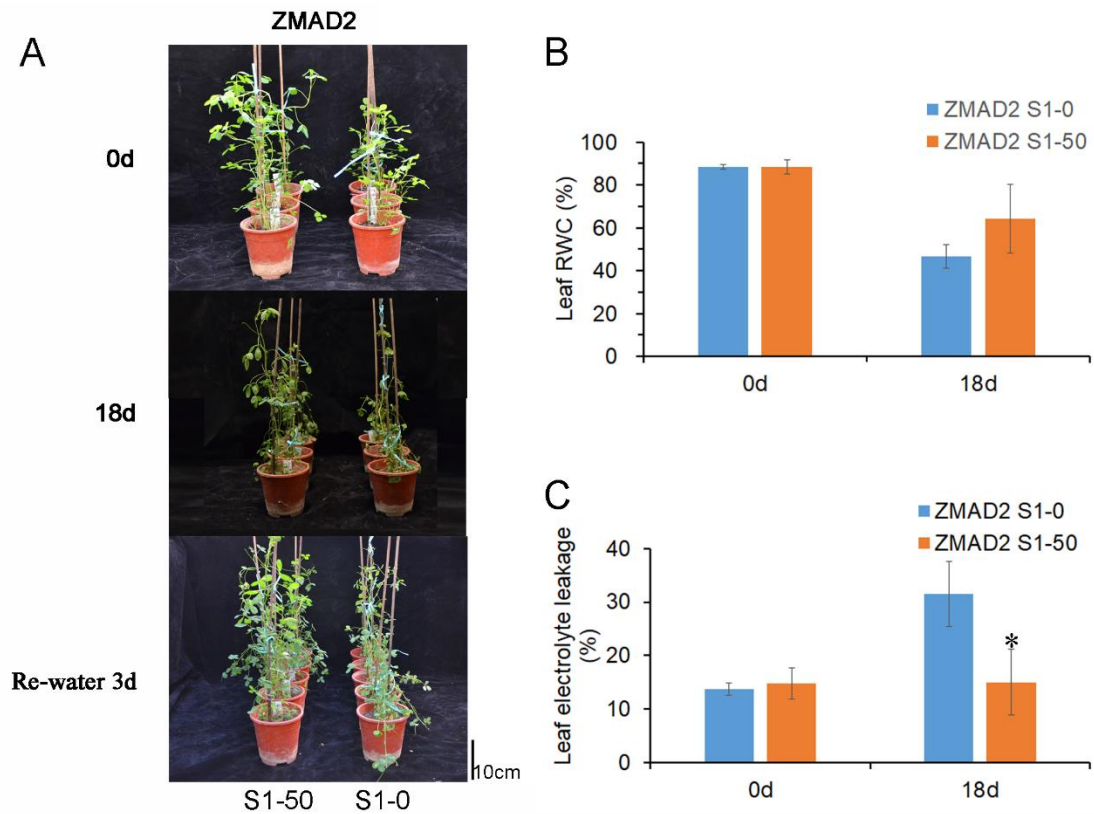

Figure S1 ABA-insensitivity phenotype of ZMAD2 showed better drought tolerance. The phenotype of water loss in isolated alfalfa leaves and its water loss rate. **A** Phenotype of ZMAD3 before and 18 d after drought treatment and 3 d after rehydration treatment. Scale bars indicate 10 cm. **B**, **C** Leaf RWC and Leaf electrolyte leakage of ZMAD2 materials before and 18 d after drought treatment. The asterisk\* indicates that the difference between S1-0 and S1-50 is statistically significant ( $P < 0.05$ ).

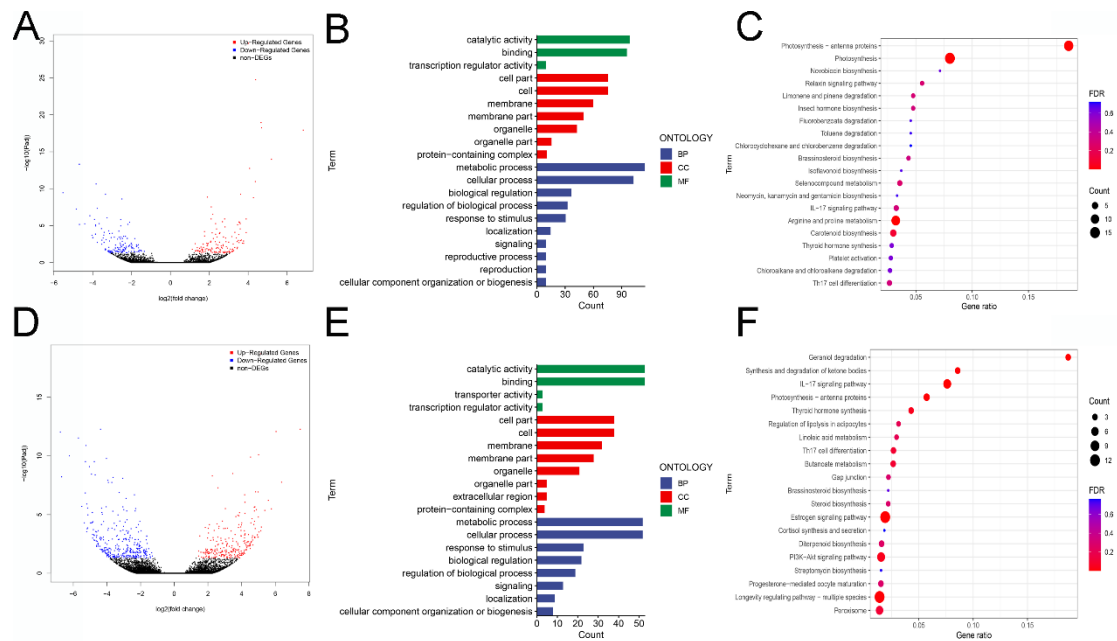

Figure S2 Leaf transcriptome analysis of S1-0 and S1-50 plant subjected to a drought stress treatment. **A** Volcano plots of up- and down-regulated DEGs in S1-0 before and after drought stress. **B** GO annotation of total DEGs in S1-0 before and after drought stress. **C** KEGG enrichment analysis of all DEGs in S1-0 before and after drought stress. **D** Volcano plots of up- and down-regulated DEGs of S1-50 before and after drought stress. **E** GO annotation of all DEGs in S1-50 before and after drought stress. **F** KEGG enrichment analysis of all DEGs in S1-50 before and after drought stress. The enrichment factor indicates the ratio of the proportion of DEGs in the pathway to the proportion of all genes annotated as the pathway. Blue dots in **a** represent genes with down-regulated expression, and red dots represent genes with up-regulated expression, the larger the enrichment factor, the darker the color, and the higher the confidence of the pathway results.

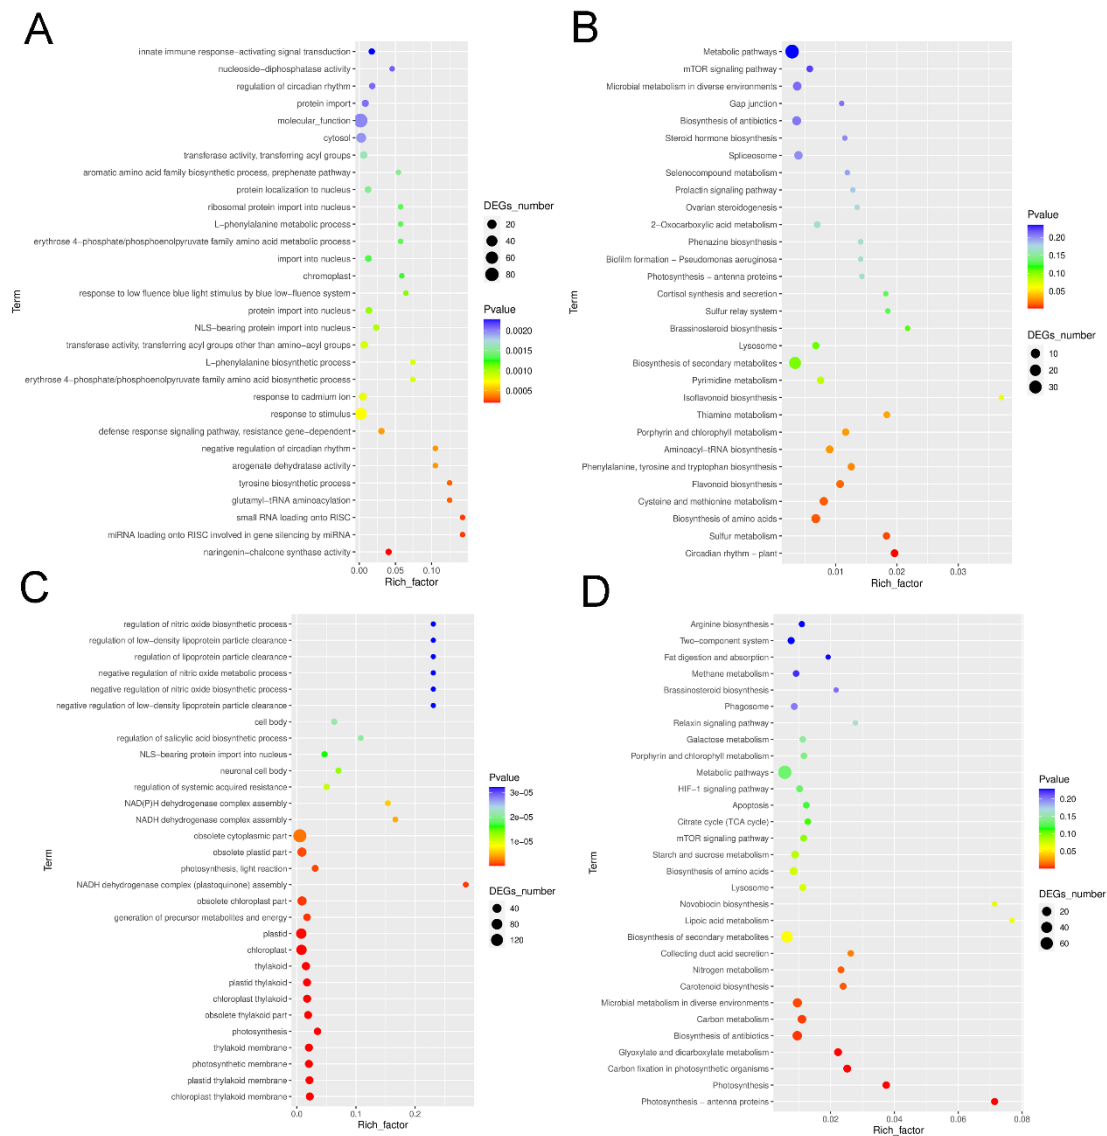

Figure S3 Transcriptome analysis before and after drought treatment of S1-0 compared to S1-50. **A** GO annotation of total DEGs in S1-0 compared to S1-50 before drought stress. **B** KEGG enrichment analysis of total DEGs in S1-0 versus S1-50 before drought stress. **C** GO annotation of total DEGs in S1-0 vs. S1-50 after drought stress. **D** KEGG enrichment analysis of total DEGs in S1-0 vs. S1-50 comparisons after drought stress.

Table S1 ABA Synthesis and Signal Transduction and Wax Synthesis Pathways Schematically Occurring Genes and their FPKM values.

| Gene    | Gene ID       | S1-0        | S1-50       | DS1-0       | DS1-50      |
|---------|---------------|-------------|-------------|-------------|-------------|
| CER     | MS.gene046442 | 0.596667    | 5.573333333 | 0.1         | 8.883333    |
| WSD     | MS.gene92380  | 0           | 20.18333333 | 0           | 12.74       |
| PYS     | MS.gene69489  | 0.71        | 11.16333333 | 0           | 7.123333333 |
| PYS     | MS.gene22206  | 1.23        | 4.11        | 0.073333333 | 1.816666667 |
| PYS     | MS.gene46942  | 16.17       | 28.26       | 2.11        | 16.05       |
| NCED    | MS.gene062834 | 0.49        | 0.22        | 10.14       | 0.623333333 |
| NCED    | MS.gene063446 | 0.966666667 | 1.176666667 | 19.98       | 1.736666667 |
| NCED    | MS.gene039190 | 1.126666667 | 1.383333333 | 17.19333333 | 2.793333333 |
| ABA2    | MS.gene28847  | 79.87666667 | 67.8        | 5.886666667 | 30.25666667 |
| AOG     | MS.gene21268  | 0.653333333 | 2.913333333 | 0.873333333 | 6.6         |
| PYR/PYL | MS.gene33451  | 16.70666667 | 4.97        | 0.266666667 | 0.516666667 |
| PYR/PYL | MS.gene052795 | 7.68        | 3.303333333 | 0.496666667 | 0.943333333 |
| PYR/PYL | MS.gene67442  | 7.403333333 | 14.3        | 0.48        | 0.493333333 |
| PYR/PYL | MS.gene99506  | 16.95666667 | 16.24666667 | 2.03        | 4.416666667 |
| PP2C    | MS.gene046807 | 1.193333333 | 0.346666667 | 32.41333333 | 12.17666667 |
| PP2C    | MS.gene60356  | 1.38        | 0.713333333 | 65.64666667 | 12.61333333 |
| PP2C    | MS.gene049073 | 0.566666667 | 0.886666667 | 14.03666667 | 10.42       |
| PP2C    | MS.gene83625  | 4.303333333 | 0.64        | 0.19        | 0.176666667 |
| PP2C    | MS.gene07063  | 55.67       | 40.40666667 | 6.376666667 | 14.9        |
| SnRK2   | MS.gene89893  | 6.41        | 6.41        | 0.276666667 | 0.333333333 |
| SnRK2   | MS.gene041130 | 20.77333333 | 12.90333333 | 1.526666667 | 1.81        |
| NADPH   | MS.gene037818 | 5.75        | 0           | 6.11        | 0.743333333 |
| NADPH   | MS.gene38173  | 21.49333333 | 0.556666667 | 1.78        | 0           |
| ABI5    | MS.gene012975 | 0           | 0           | 4.61        | 2.776666667 |

Table S2 The primers used in the study.

| Gene ID       | Forward primer sequence       | Reverse primer sequence      |
|---------------|-------------------------------|------------------------------|
| MS.gene062834 | CTTCTTCGACGGAGACGGTATG        | TGAAGCGGCAAGAGTAACTGAC       |
| MS.gene33451  | TACCGTTCCGTTACTACACTTCATC     | CACCACATAGGACTCAACTATCACC    |
| MS.gene99506  | CGACAATCCACAAGCCTACAAAC       | CGGAGATGACACGGACTTCAC        |
| MS.gene049073 | GCCGTATTTACTAATGGATTTGAGAGG   | AACCAGATAGAACAACCACAGAGG     |
| MS.gene83625  | TATACATAATCAATCCTCGCAATCTTCTG | ATATTATCATCAACCGTGACAGTATTCG |
| MS.gene07063  | ACGGTTGTGACTGTGAGGATTG        | TGGATATGGAGAGCCTTTGATTGG     |
| Actin         | CAAAAGATGGCAGATGCTGAGGAT      | CATGACACCAGTATGACGAGGTCG     |
